# Supplementary material for: Exploitation of virgin olive oil by‐products (Olea europaea L.): phenolic and volatile compounds transformations phenomena in fresh two‐phase olive pomace (‘alperujo’) under different storage conditions
Source: PubMed Central journal article supplement (PMC9298029; doi:10.1002/jsfa.11593), 2021-11-04
Supplement: JSFA-102-2515-s001.pdf [file JSFA-102-2515-s001.pdf]

## Supplementary file of the manuscript

### **Exploitation of virgin olive oil by-products (*Olea europaea* L.): phenolic and volatile compounds transformations phenomena in fresh two-phase olive pomace (“alperujo”) under different storage conditions**

Lorenzo Cecchi<sup>a</sup>, Marzia Migliorini<sup>b</sup>, Elisa Giambanelli<sup>b</sup>, Valentina Canuti<sup>c</sup>, Maria Bellumori<sup>a</sup>, Nadia Mulinacci<sup>a</sup>, Bruno Zanoni<sup>c</sup>

<sup>a</sup> Department of NEUROFARBA, University of Florence, Via Ugo Schiff 6, 50019 Sesto F.no, Florence, Italy

<sup>b</sup> Carapelli Firenze S.p.A., Via Leonardo da Vinci 31, Tavarnelle Val di Pesa, 50028, Firenze, Italy.

<sup>c</sup> Department of Agricultural, Food and Forestry Systems Management (DAGRI), University of Florence, Piazzale Delle Cascine 16, 50144, Florence, Italy.

#### ORCID

Lorenzo Cecchi: 0000-0002-9332-704X

Nadia Mulinacci: 0000-0001-7873-5259

Elisa Giambanelli: 0000-0002-4164-7770

Bruno Zanoni: 0000-0002-9020-6883

\*Corresponding author: Nadia Mulinacci

Tel.: +39 055 4573773

E-mail: [nadia.mulinacci@unifi.it](mailto:nadia.mulinacci@unifi.it)

**Scheme S1.** Process diagram of the experimental plan

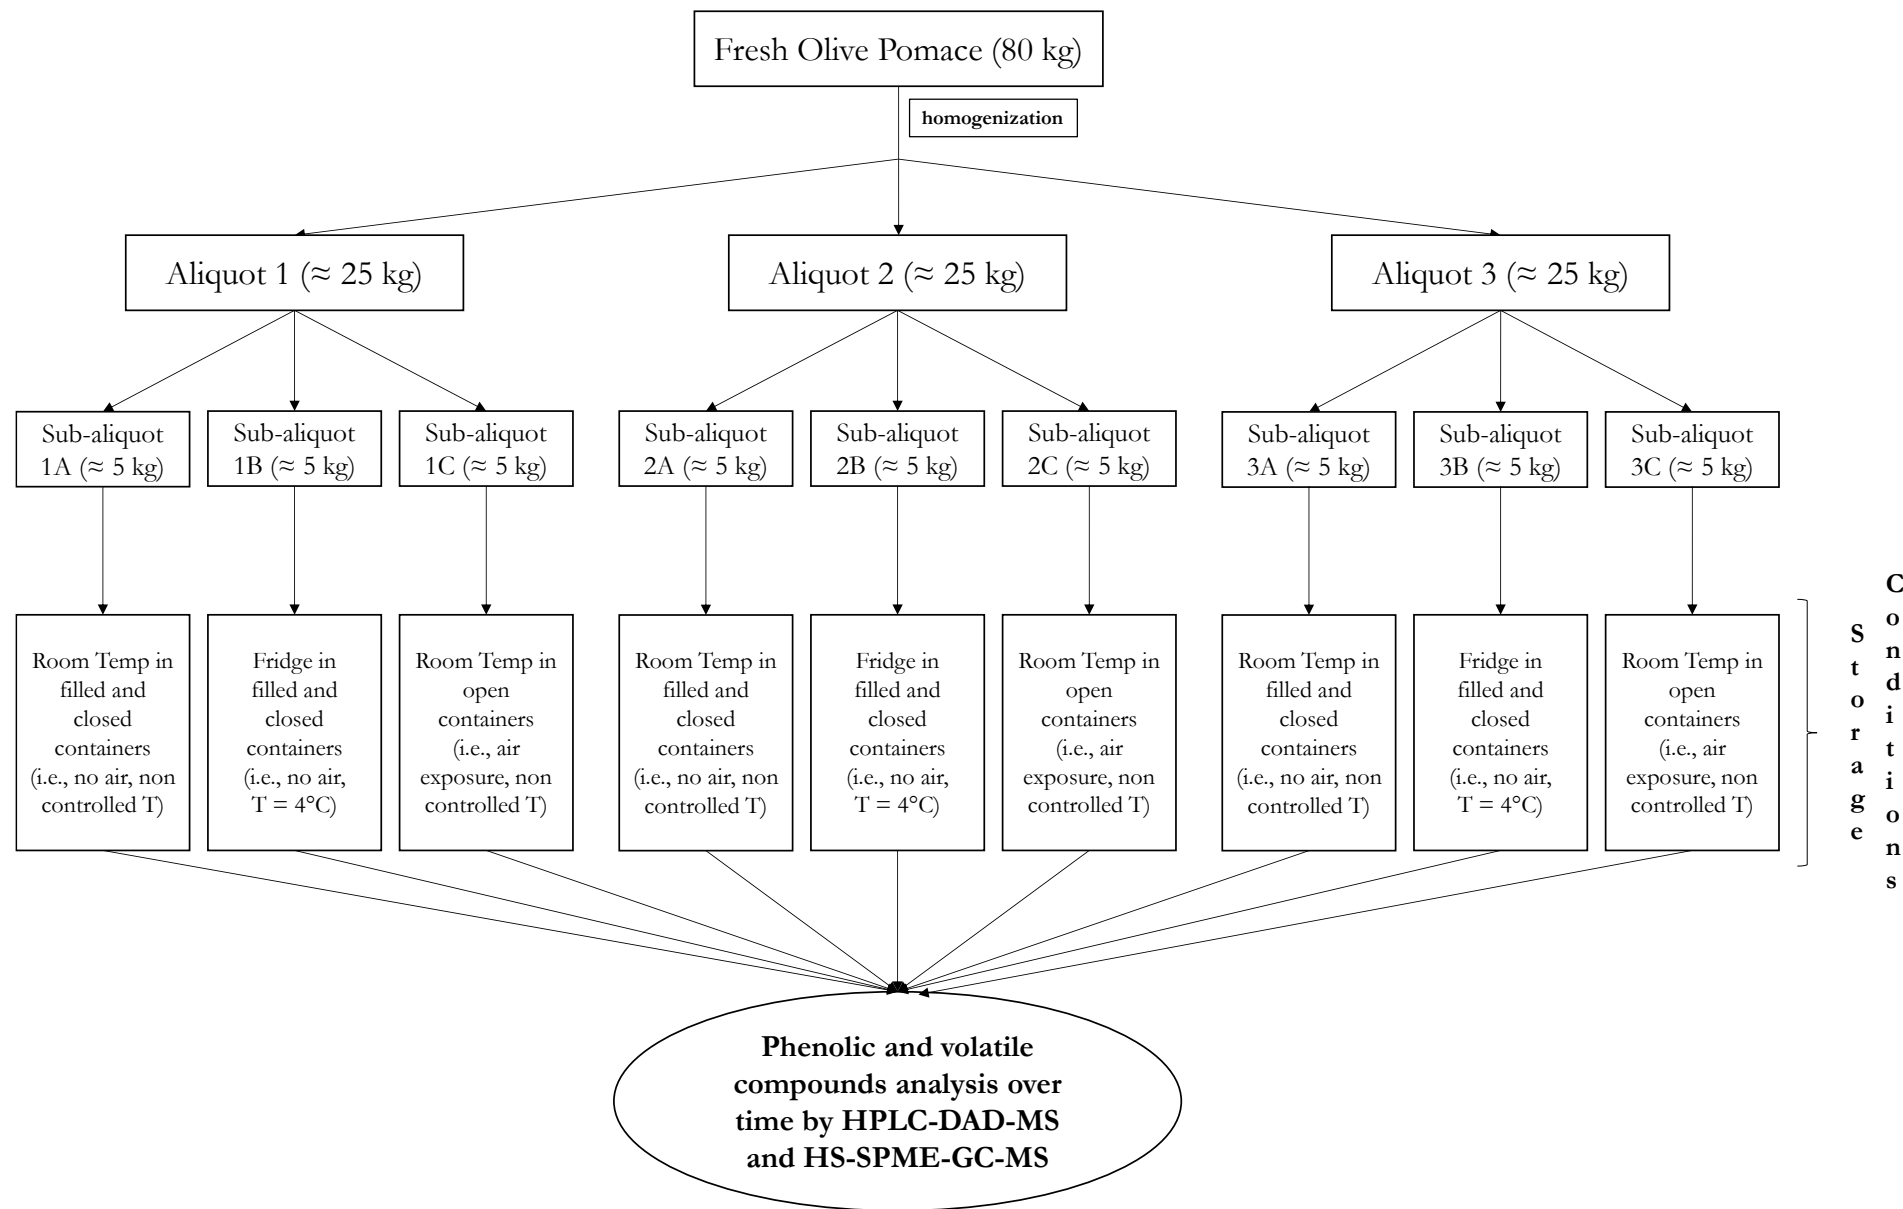

**Figure S1.** Chemical structure of the main phenolic compounds detected in alperujo samples.

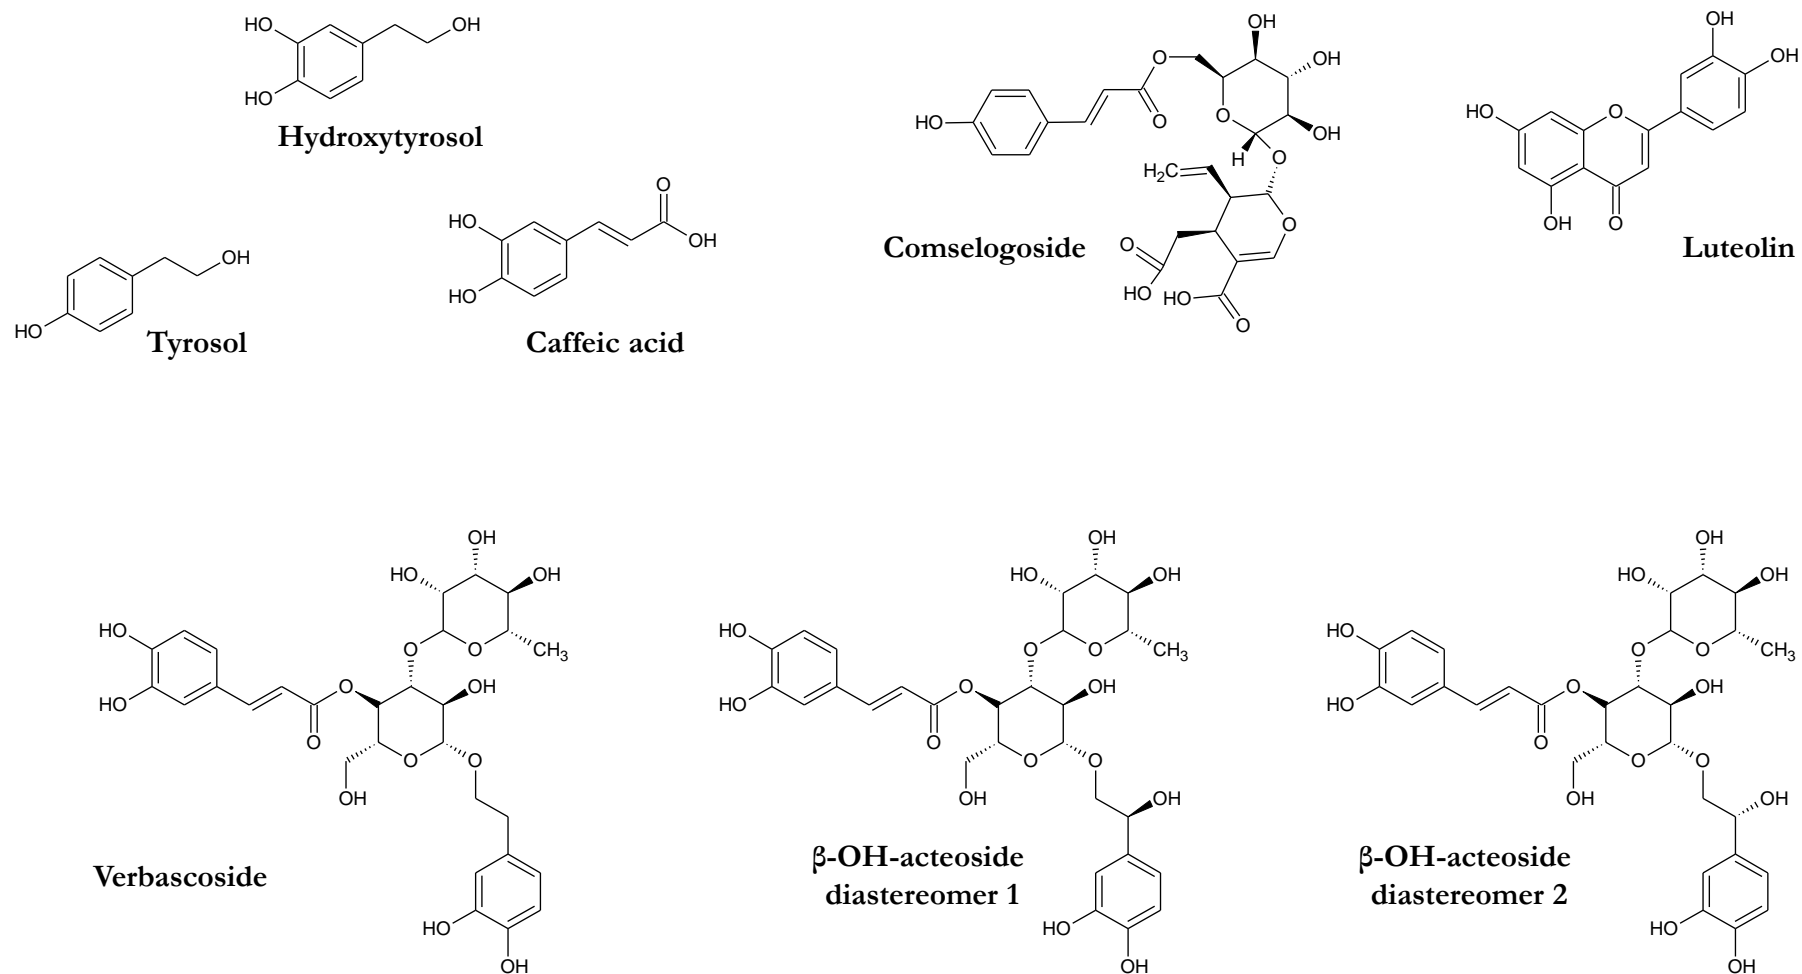

**Figure S2.** Chromatographic profile at 280 nm of A) the fresh alperujo sample at time 0 and after 10 days in open and 4°C conditions, B) the commercial standard of the dialdehydic form of decarboxymethyl oleuropein aglycone (oleacein), C) the commercial standard of the dialdehydic form of decarboxymethyl ligstroside aglycone (oleocanthal).

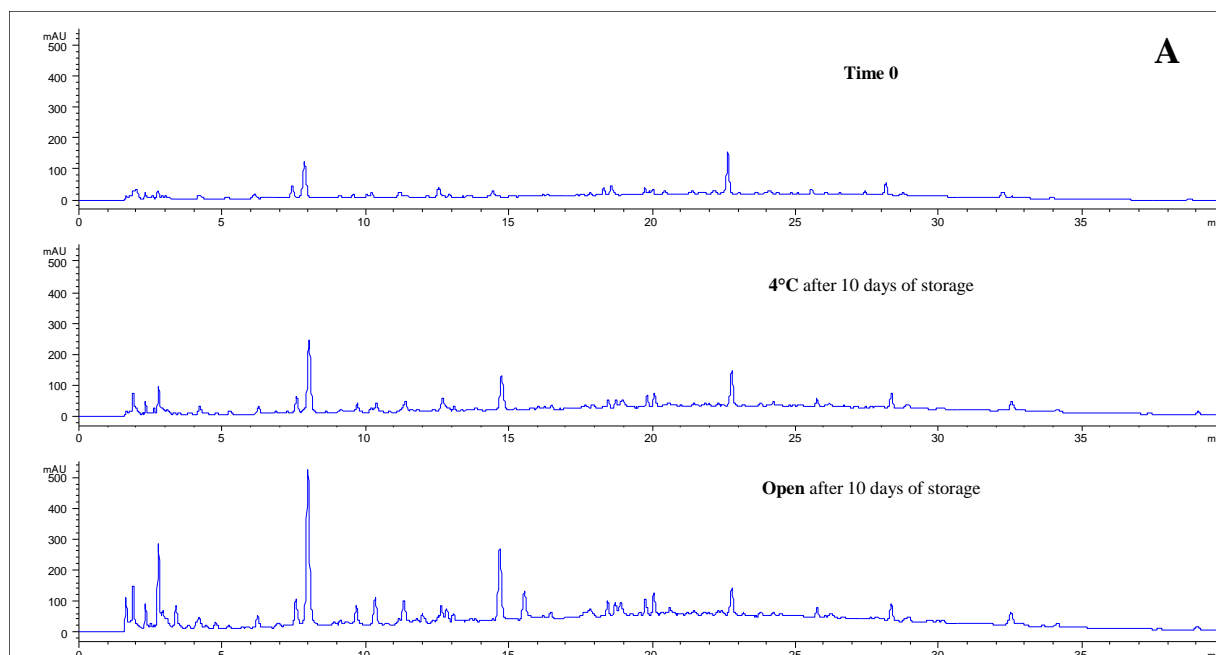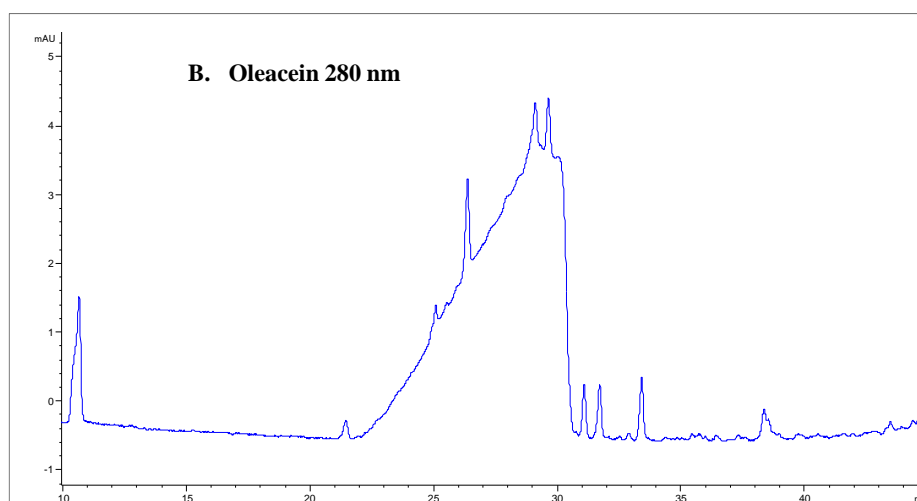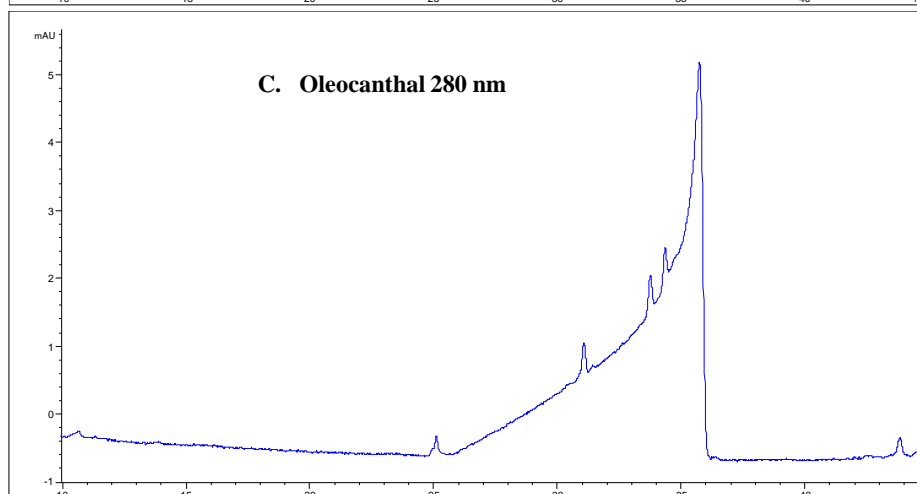

**Figure S3.** Total Ion Current (TIC) chromatograms of the volatile profile of the olive pomace at time 0 (A) and after storage in open containers after 2 days (B) and after 10 days (C). All the three chromatograms are reported at the same scale.

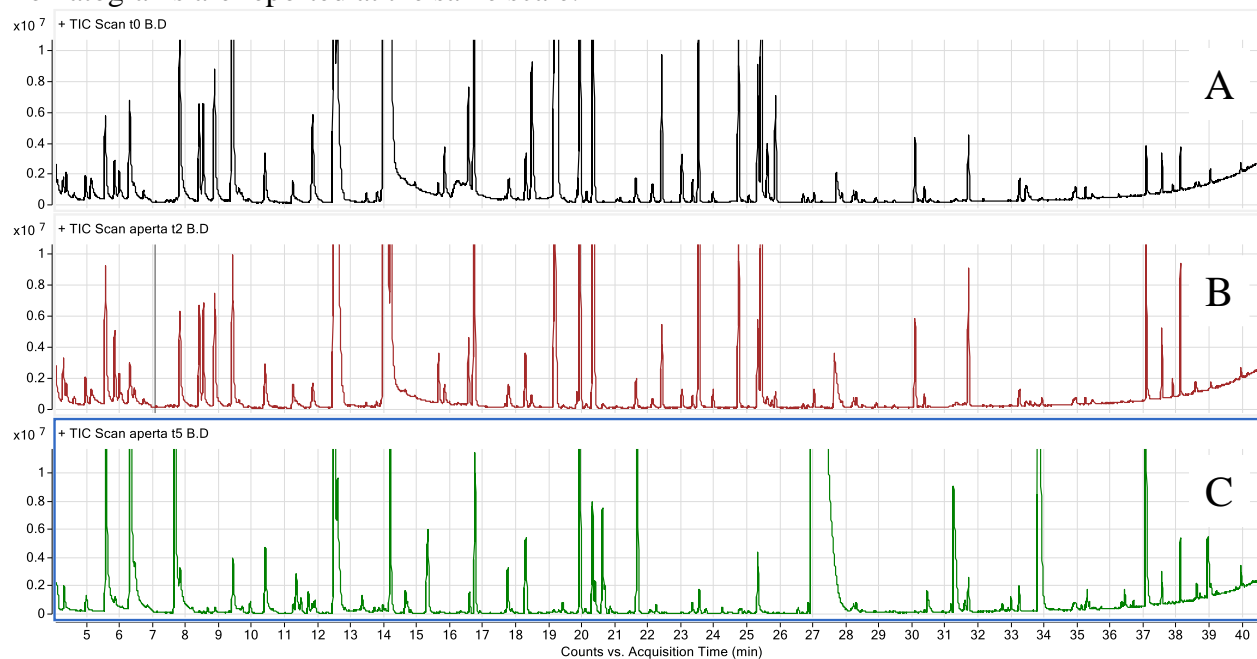

**Figure S4.** Evolution over storage of octane and styrene according to type of storage: at 4°C in the fridge (4°C), at room temperature in full close containers (close) and at room temperature in open containers. Data are the mean of 3 independent measurements and are expressed on dried weight basis.

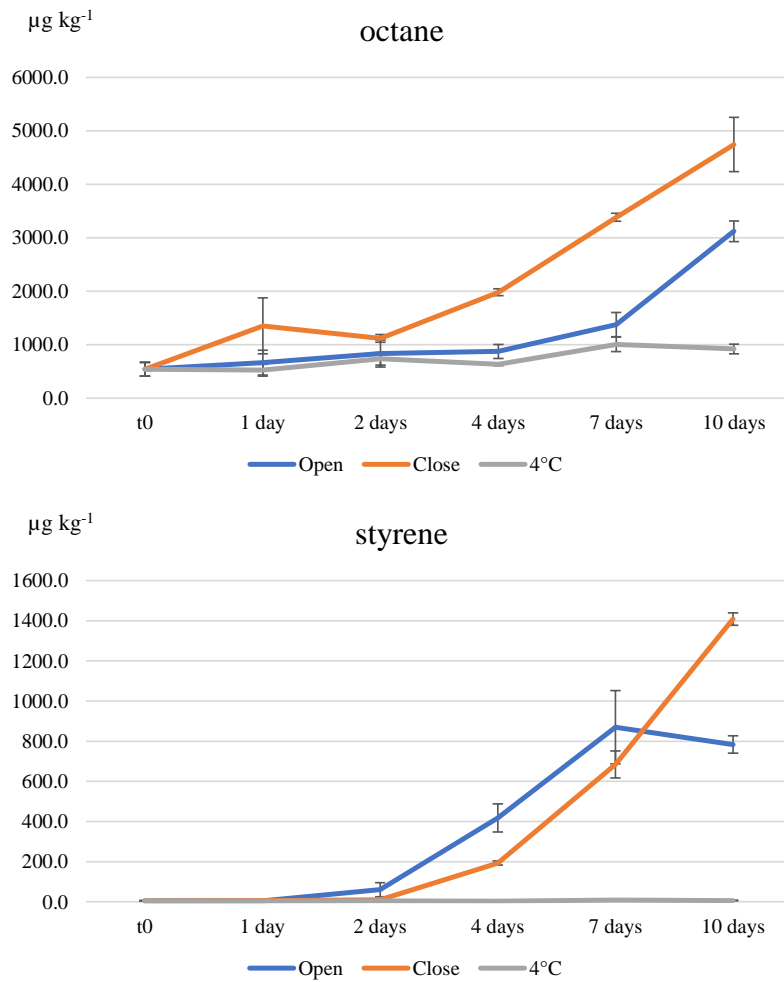

**Table S1.** *p*-values evaluated by two factor ANOVA for each phenolic molecule. The two factors were the type of storage (Storage) and storage time (Time), and the two-way interaction Storage × Time was also considered. Significant values at *p* < 0.05 are in italic

|                                 | Storage        | Time           | Storage x Time |
|---------------------------------|----------------|----------------|----------------|
| hydroxytyrosol glucoside        | <i>8.4E-13</i> | <i>1.9E-13</i> | <i>7.4E-09</i> |
| hydroxytyrosol                  | <i>1.2E-11</i> | <i>8.9E-18</i> | <i>2.3E-14</i> |
| hydroxytyrosol after hydrolysis | <i>1.3E-06</i> | 0.18           | <i>1.9E-06</i> |
| tyrosol glucoside               | <i>5.5E-09</i> | <i>3.4E-10</i> | <i>3.1E-07</i> |
| tyrosol after hydrolysis        | <i>2.1E-04</i> | <i>4.3E-05</i> | <i>9.0E-06</i> |
| tyrosol                         | <i>3.2E-13</i> | <i>1.3E-18</i> | <i>1.8E-12</i> |
| caffeic acid                    | <i>4.4E-20</i> | <i>4.3E-31</i> | <i>1.6E-16</i> |
| β-OH-acteoside 1                | <i>2.7E-11</i> | <i>1.4E-17</i> | <i>2.8E-06</i> |
| β-OH-acteoside 2                | <i>1.9E-07</i> | <i>2.8E-15</i> | <i>2.2E-04</i> |
| verbascoside                    | <i>7.6E-14</i> | <i>1.1E-24</i> | <i>7.0E-11</i> |
| comselogoside                   | <i>1.5E-12</i> | <i>2.8E-20</i> | <i>2.7E-08</i> |
| luteolin                        | 0.43           | <i>3.7E-14</i> | <i>3.4E-05</i> |
| TPC                             | <i>5.1E-05</i> | <i>2.3E-05</i> | <i>1.3E-05</i> |

**Table S2.** VOCs data processing of alperujo samples. *p*-values calculated for each VOC by two factor ANOVA, where the two factors were the storage time (**time**) and the type of storage (**storage**). The two-way interaction time×storage is also reported. Non-significant values (*p* > 0.05) are in italic.

|                                               | Storage     | Time        | Storage x Time |
|-----------------------------------------------|-------------|-------------|----------------|
| Acetic acid                                   | 2.87333E-38 | 3.72917E-41 | 5.62416E-41    |
| 3-Methyl butanoic acid                        | 2.52404E-34 | 2.86583E-38 | 1.80117E-40    |
| ( <i>E</i> )-2-Pentenoic acid                 | 2.60434E-31 | 2.0849E-34  | 4.59378E-37    |
| Pentanoic acid                                | 2.66132E-30 | 2.73578E-33 | 1.66388E-34    |
| Propanoic acid                                | 1.22328E-28 | 1.73116E-30 | 1.56937E-32    |
| Methyl 3-methylbutanoate                      | 2.03372E-25 | 1.79038E-30 | 8.82867E-33    |
| 2-Methyl propanoic acid                       | 4.98891E-28 | 2.96907E-30 | 1.56048E-32    |
| Acetoin acetate                               | 2.18257E-24 | 2.00839E-28 | 1.07438E-31    |
| 2-Methyl butanoic acid                        | 1.06836E-23 | 4.96913E-28 | 1.50919E-29    |
| 3-Pentanol                                    | 1.87933E-22 | 2.25974E-27 | 1.1635E-29     |
| 1-Octen-3-ol                                  | 5.82112E-24 | 3.10772E-27 | 1.87237E-29    |
| Methyl acetate                                | 1.86333E-21 | 5.24335E-27 | 7.71643E-27    |
| ( <i>E</i> )-3-Hexenoic acid                  | 1.2207E-21  | 1.98607E-25 | 2.57614E-26    |
| 2-methyl-1-butanol+3-methyl-1-butanol         | 2.9211E-22  | 8.98558E-25 | 2.64265E-24    |
| 4-Hepten-1-ol                                 | 4.23567E-28 | 6.30893E-24 | 1.40723E-26    |
| Ethyl benzoate                                | 1.07885E-21 | 2.35976E-23 | 2.34736E-25    |
| 1-Octen-3-one                                 | 1.79422E-20 | 2.93569E-23 | 4.40336E-24    |
| Ethyl hexanoate                               | 9.62267E-21 | 1.45063E-22 | 1.04466E-24    |
| Ethyl-( <i>Z</i> )-3-hexenoate                | 4.64807E-16 | 1.23234E-21 | 9.5398E-26     |
| Methyl hexanoate                              | 5.17013E-11 | 2.0117E-21  | 3.27154E-10    |
| Hexanoic acid                                 | 1.20397E-11 | 2.57463E-21 | 4.54472E-14    |
| Phenyl ethanol                                | 3.20778E-16 | 6.12805E-21 | 1.86376E-19    |
| Styrene                                       | 1.30511E-15 | 8.61611E-21 | 7.84042E-16    |
| Nonyl acetate                                 | 7.66464E-15 | 1.02628E-20 | 7.78033E-19    |
| Butanoic acid                                 | 9.11509E-16 | 2.68329E-20 | 9.44188E-17    |
| 1-Heptanol                                    | 1.32354E-24 | 7.20754E-20 | 4.85246E-21    |
| Octanoic acid                                 | 3.72728E-18 | 1.02791E-19 | 5.54223E-18    |
| 1-Propanol                                    | 2.44563E-20 | 2.51465E-19 | 1.6293E-21     |
| Hexyl acetate                                 | 2.32887E-13 | 3.02165E-19 | 2.26572E-20    |
| Ethyl acetate                                 | 2.28162E-12 | 5.19429E-19 | 1.11605E-19    |
| 2-Methyl-1-propanol                           | 2.83673E-15 | 5.79771E-19 | 3.26686E-20    |
| Heptanoic acid                                | 1.5779E-14  | 9.353E-19   | 7.80402E-20    |
| Ethyl 2-methylpropanoate                      | 8.75989E-14 | 4.52388E-18 | 7.21527E-15    |
| Pentyl acetate                                | 4.84896E-11 | 1.68031E-17 | 1.56413E-18    |
| 1-Nonanol                                     | 7.3287E-17  | 1.77986E-17 | 5.22497E-16    |
| 1-Decanol                                     | 1.5631E-19  | 2.02826E-17 | 4.94009E-18    |
| 2-Methyl-2,3-pentanediol                      | 2.05751E-18 | 9.31283E-17 | 3.35937E-18    |
| ( <i>Z</i> )-2-Pentenyl acetate               | 3.62277E-12 | 9.41489E-17 | 1.19475E-16    |
| Ethyl 3-methylbutanoate                       | 1.00484E-10 | 3.74199E-16 | 1.1266E-11     |
| 2-Methylbutyl acetate + 3-methylbutyl acetate | 6.06872E-08 | 1.81113E-15 | 6.31398E-13    |
| 2-Hydroxy-3-pentanone                         | 9.36231E-16 | 3.78008E-15 | 1.64627E-16    |
| Octane                                        | 5.81433E-13 | 4.40872E-15 | 1.69403E-08    |
| ( <i>E,E</i> )-2,4-Hexadienal                 | 8.31398E-06 | 6.29808E-15 | 0.51512448     |
| Ethyl nonanoate                               | 1.20573E-13 | 8.52192E-15 | 2.05218E-14    |
| Ethyl octanoate                               | 8.81802E-15 | 1.09819E-14 | 2.09877E-16    |
| 2,2-Dimethyl-1-propanol                       | 7.41256E-17 | 3.13559E-14 | 4.89792E-13    |



|                                |             |             |             |
|--------------------------------|-------------|-------------|-------------|
| (Z)-3-Hexenyl acetate          | 1.67812E-08 | 3.6027E-14  | 1.64593E-15 |
| Limonene                       | 0.047314201 | 8.70377E-14 | 0.005347179 |
| Ethyl decanoate                | 3.76224E-13 | 8.99621E-14 | 1.09778E-15 |
| Benzyl Alcohol                 | 1.69957E-10 | 9.61069E-14 | 3.42946E-13 |
| 1-Hexanol                      | 3.07861E-12 | 1.12244E-13 | 7.45523E-11 |
| Methyl propanoate              | 2.94579E-10 | 1.64078E-13 | 4.01576E-10 |
| 1-Butanol                      | 3.11612E-08 | 1.81544E-13 | 5.55057E-10 |
| 2,2-Dimethyl propanoic acid    | 3.71133E-10 | 2.4585E-13  | 6.49333E-14 |
| 3-Hydroxy-2-butanone (acetoin) | 2.15772E-13 | 7.49771E-13 | 8.6821E-16  |
| Heptyl acetate                 | 4.97871E-06 | 8.75673E-13 | 3.0088E-08  |
| Methyl octanoate               | 1.80574E-17 | 1.11211E-12 | 5.74551E-15 |
| (Z)-3-hexenal                  | 0.000160964 | 3.2284E-12  | 0.652685924 |
| Ethyl butanoate                | 1.02561E-08 | 5.86089E-12 | 7.89313E-13 |
| (E)-2 Hexenal                  | 1.36725E-06 | 6.48132E-12 | 0.27562446  |
| 2-Octanone                     | 8.39845E-07 | 7.8548E-12  | 7.98519E-05 |
| Ethyl 3-methyl-2-butenate      | 1.52636E-05 | 1.14437E-11 | 0.251118742 |
| Isobutylacetate                | 1.65955E-06 | 1.229E-11   | 1.51702E-11 |
| Ethyl propanoate               | 1.12307E-07 | 1.27068E-11 | 3.09163E-12 |
| 1-Penten-3-one                 | 0.031401343 | 2.68036E-11 | 0.710576889 |
| 1-Pentanol                     | 5.82448E-15 | 3.38804E-11 | 3.49085E-12 |
| Ethyl heptanoate               | 7.42789E-08 | 3.80106E-11 | 3.71183E-10 |
| Ethanol                        | 3.44778E-11 | 4.50196E-11 | 2.45636E-12 |
| 1-Hydroxy-2-propanone          | 3.55261E-09 | 8.21599E-10 | 2.12795E-12 |
| (E)-2-Pentenal                 | 1.31277E-05 | 2.25531E-09 | 0.251458378 |
| 2,2-Dimethyl-1-propyl acetate  | 1.33887E-09 | 2.43726E-09 | 1.20159E-11 |
| Methyl decanoate               | 4.6237E-12  | 3.43057E-09 | 5.05552E-11 |
| (E)-2-Hexen-1-ol               | 2.57136E-12 | 3.98599E-09 | 4.32823E-11 |
| (E)-2-Penten-1-ol              | 1.17579E-08 | 6.03044E-09 | 8.91969E-05 |
| 1-Octanol                      | 5.66564E-12 | 7.76138E-09 | 7.1712E-10  |
| Methyl heptanoate              | 0.000532332 | 1.11892E-08 | 6.97416E-06 |
| (E)-3-Hexen-1-ol               | 7.88218E-17 | 2.08154E-08 | 4.00032E-10 |
| 2-Pentanol                     | 0.33304922  | 3.5473E-08  | 0.000926408 |
| 4-Ethyl-phenol                 | 1.8675E-07  | 3.66565E-08 | 2.77354E-10 |
| 2,3-Butanedione                | 8.17689E-06 | 4.0649E-08  | 0.000337648 |
| Nonanoic acid                  | 1.99196E-08 | 1.9425E-07  | 1.85567E-09 |
| Ethyl pentanoate               | 0.000783374 | 6.01108E-07 | 1.04444E-08 |
| (Z)-2-Hexen-1-ol               | 2.62659E-15 | 6.40125E-07 | 5.98001E-08 |
| (Z)-3-Hexen-1-ol               | 4.0564E-08  | 2.41197E-06 | 4.41281E-09 |
| (Z)-2-Penten-1-ol              | 8.3516E-07  | 4.15549E-06 | 0.022741744 |
| 2-Heptanol                     | 0.017573029 | 6.51461E-06 | 0.002214252 |
| Hexanal                        | 0.004939952 | 2.67279E-05 | 0.104184313 |
| 2-Heptanone                    | 0.840768764 | 0.000124289 | 0.085356588 |
| Octanal                        | 0.001382303 | 0.000175684 | 0.213637054 |
| 3-Methylbutanal                | 0.002716883 | 0.000194814 | 0.010794553 |
| Heptanal                       | 0.004086507 | 0.000195405 | 0.037380242 |
| (E)-2-Heptenal                 | 0.000107487 | 0.000203516 | 0.087413602 |
| (E)-2-Octenal                  | 0.00078261  | 0.000711534 | 0.141736992 |
| (E,E)-2,4-Nonadienal           | 0.000930442 | 0.001208263 | 0.032599937 |
| 2-Methylbutanal                | 0.002970931 | 0.001446163 | 0.023243709 |
| 2-Methylpropanal               | 0.013816763 | 0.001957445 | 0.080941771 |
| Methyl isobutyl ketone         | 0.001025987 | 0.002037944 | 0.000178994 |
| Pentanal                       | 0.128395638 | 0.002474495 | 0.007157624 |
| 1-Penten-3-ol                  | 5.12522E-05 | 0.002780428 | 0.420032735 |
| (E,E)-2,4-Heptadienal          | 0.000254386 | 0.003066809 | 0.142757234 |

|                                |             |             |             |
|--------------------------------|-------------|-------------|-------------|
| <b>(E)-2-Decenal</b>           | 0.010327312 | 0.003249809 | 0.073592893 |
| <b>Methanol</b>                | 9.30286E-09 | 0.00674298  | 0.025769557 |
| <b>4-Hexen-2-one</b>           | 2.64845E-08 | 0.014508132 | 0.007102205 |
| <b>3-Pentanone</b>             | 0.00460309  | 0.019540282 | 4.3788E-05  |
| <b>Methyl nonanoate</b>        | 4.01902E-05 | 0.022199507 | 0.008174644 |
| <b>Acetaldehyde</b>            | 0.006019301 | 0.022964923 | 2.57121E-08 |
| <b>(E,E)-2,4-Decadienal</b>    | 0.003967724 | 0.037448943 | 0.566879943 |
| <b>Nonanal</b>                 | 0.046950542 | 0.052879679 | 0.362236777 |
| <b>6-Methyl-5-hepten-2-one</b> | 0.06526592  | 0.074896564 | 0.656242764 |
| <b>Benzaldehyde</b>            | 9.60959E-08 | 0.079269703 | 9.05797E-08 |
| <b>Heptane</b>                 | 0.129495071 | 0.20436331  | 0.679727785 |
| <b>Butanone</b>                | 0.003522836 | 0.255692685 | 0.006072708 |
| <b>Toluene</b>                 | 0.241279217 | 0.290491842 | 0.535406712 |

---
